# Supplementary material for: Effects on Colonization Factors and Mechanisms Involved in Antimicrobial Sonophotodynamic Inactivation Mediated by Curcumin
Source: MDPI journal article supplement (doi:10.3390/pharmaceutics15102407), 2023-09-30

**Figure S1.** Raw Confocal Images obtained of the biofilms from the control, light, US, PDI, SDI and SPDI groups. Biofilms were stained with LIVE/DEAD (SYTO 9 and Propidium Iodide), which mark viable (green color) and nonviable cells (red color). The ECM was stained with Calcofluor White (blue color). The stained biofilms were imaged, using as excitation/emission wavelengths at 480/500 nm for SYTO-9 stain, 490/635 nm for PI and 405/433 nm for Calcofluor, as recommended by the manufacturers. The green boxes are transversal images showing the thickness of the biofilms.

**Control**

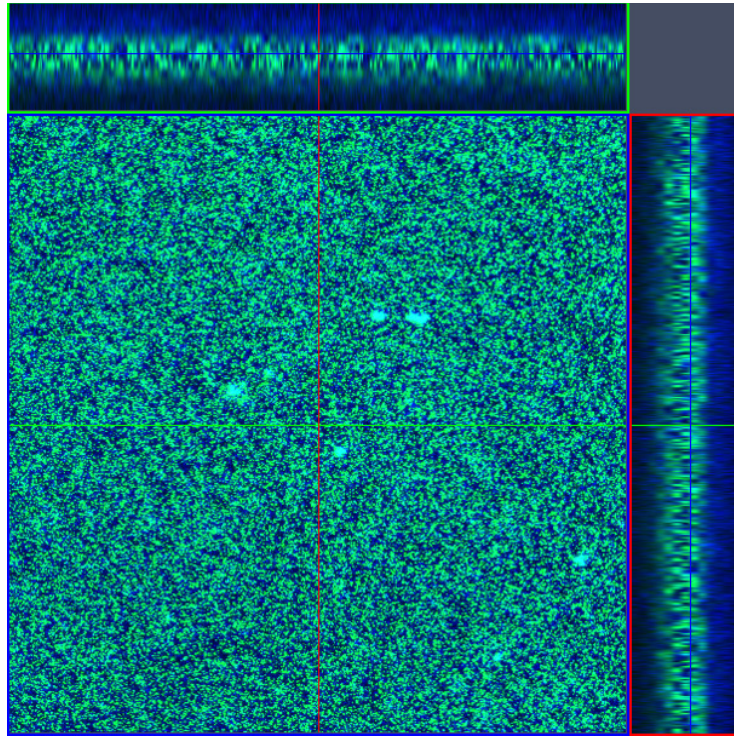

**Light**

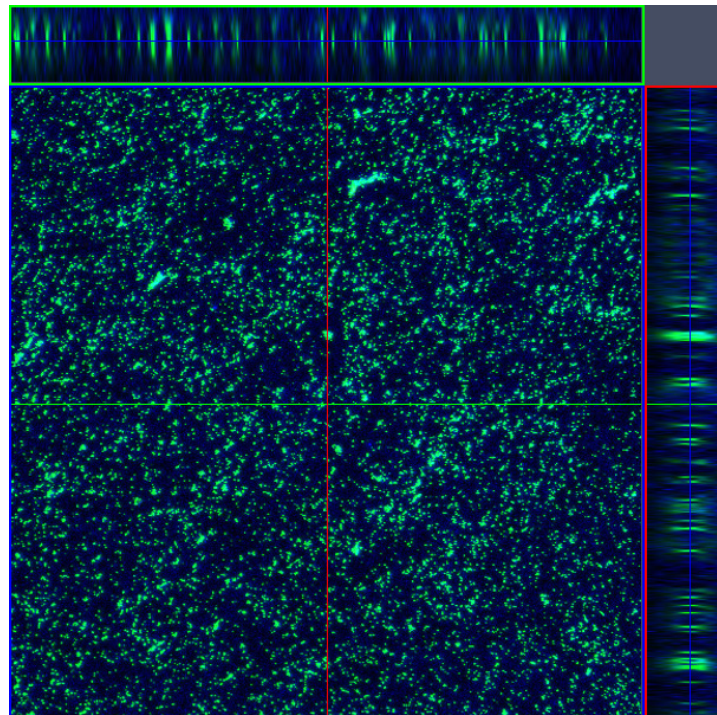

US

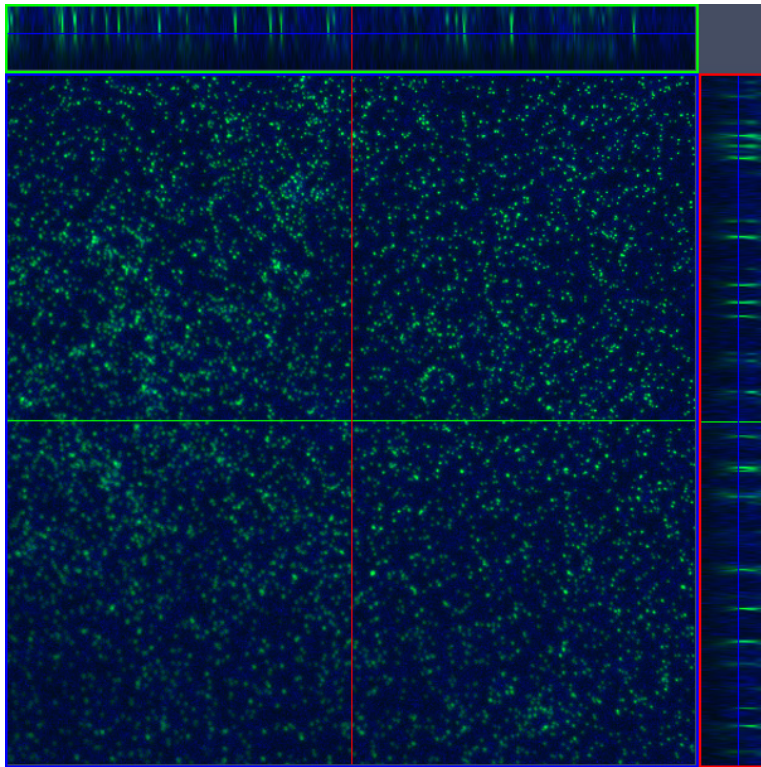

PDI

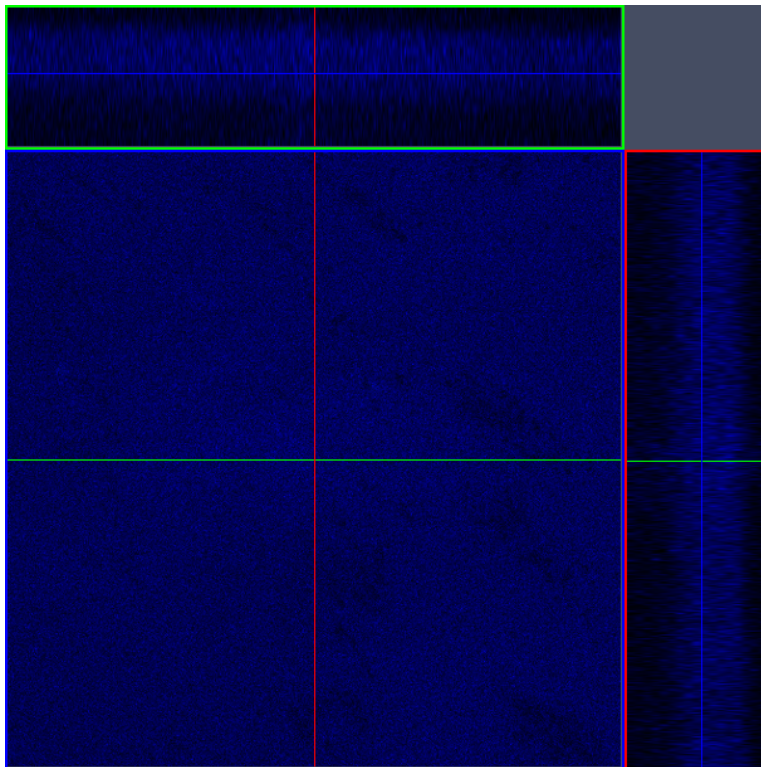



SDI

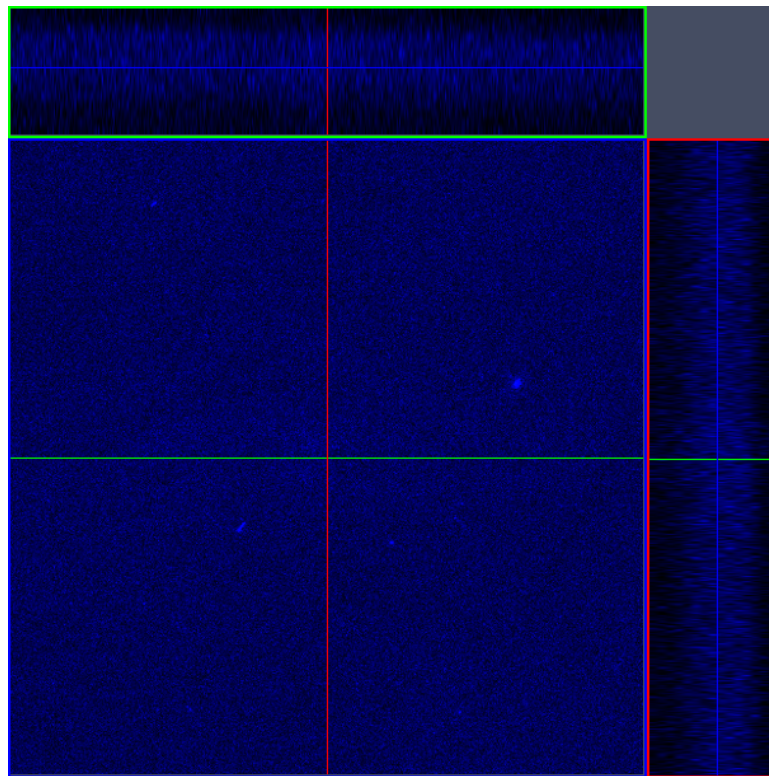

SPDI

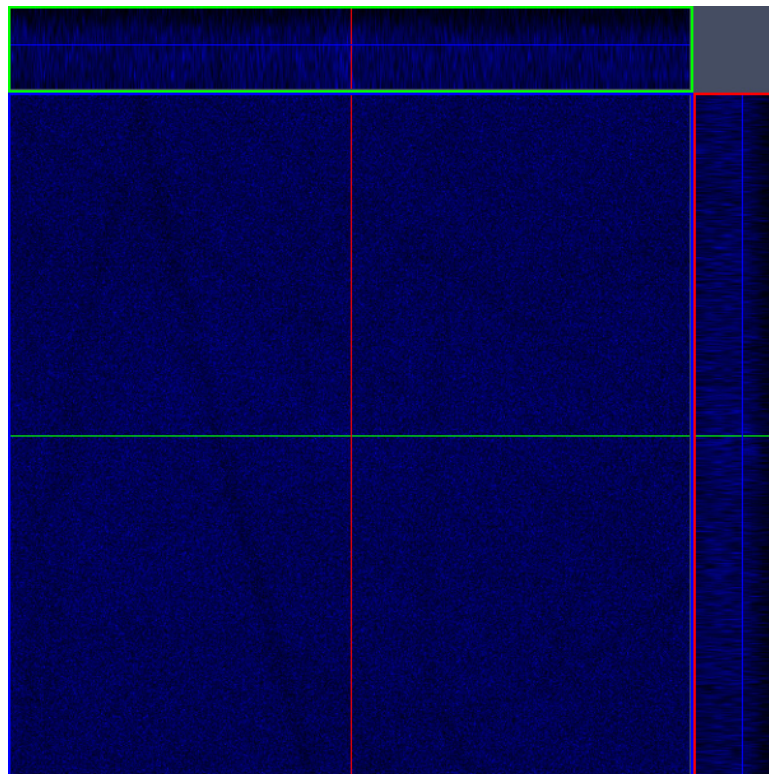

**Figure S2.** Raw OCT images obtained from the Control, light US, US+Light, PDI, SDI and SPDI groups. Images were obtained with medium sensitivity, speed of 76 kHz, with field image correction, subsampling filter, scanning pattern of 400 x 400 x 512 pixels (X, Y, Z) and pixel size of 5 x 5 x 2.49  $\mu\text{m}$  (X, Y, Z). Transversal images of the biofilms were obtained to evaluate the cell density, thickness and topography of the biofilm.

**Control**

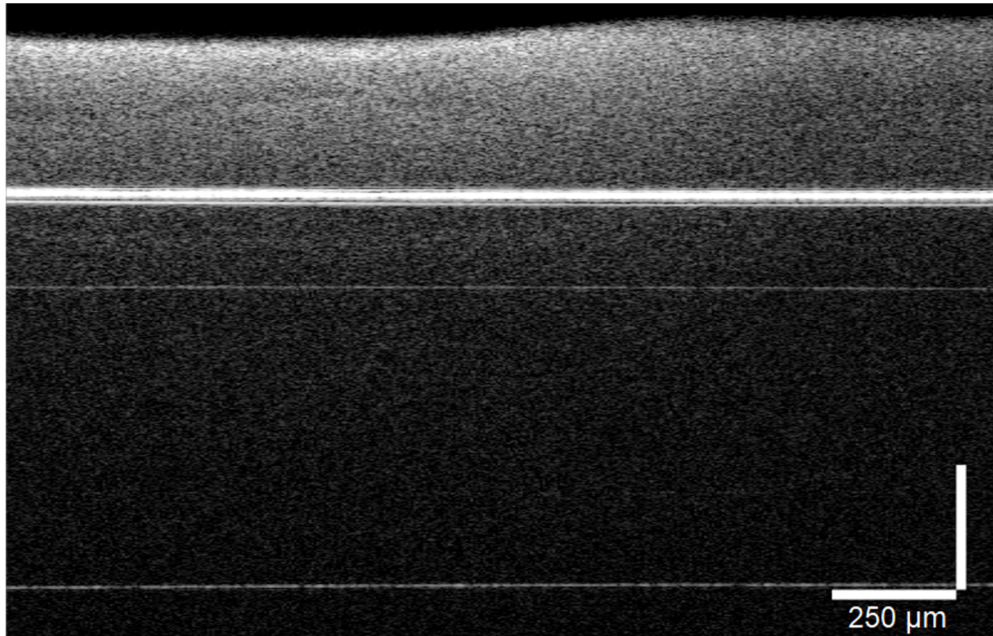

**Light**

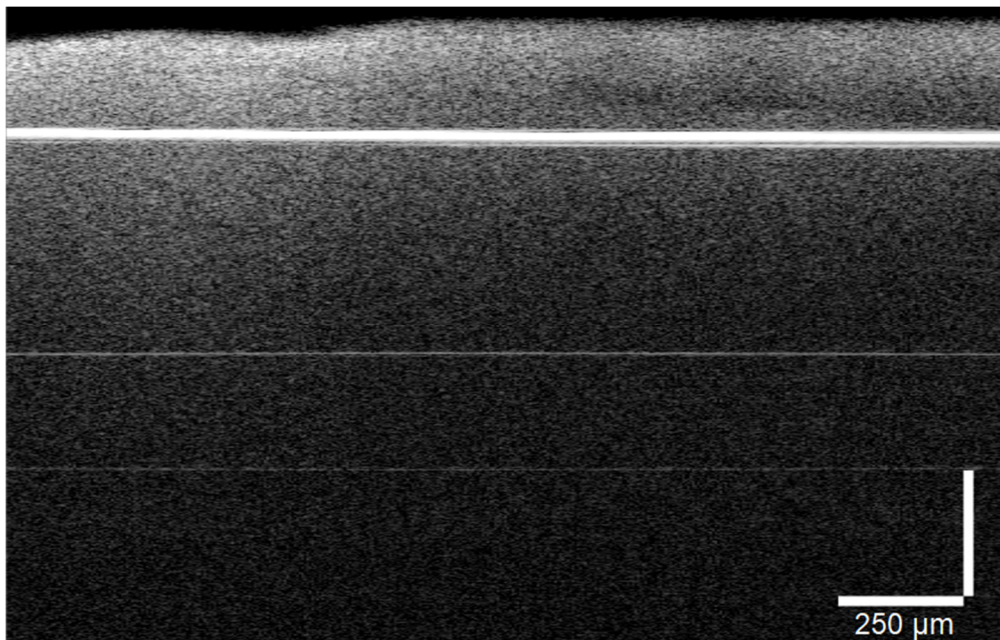



US

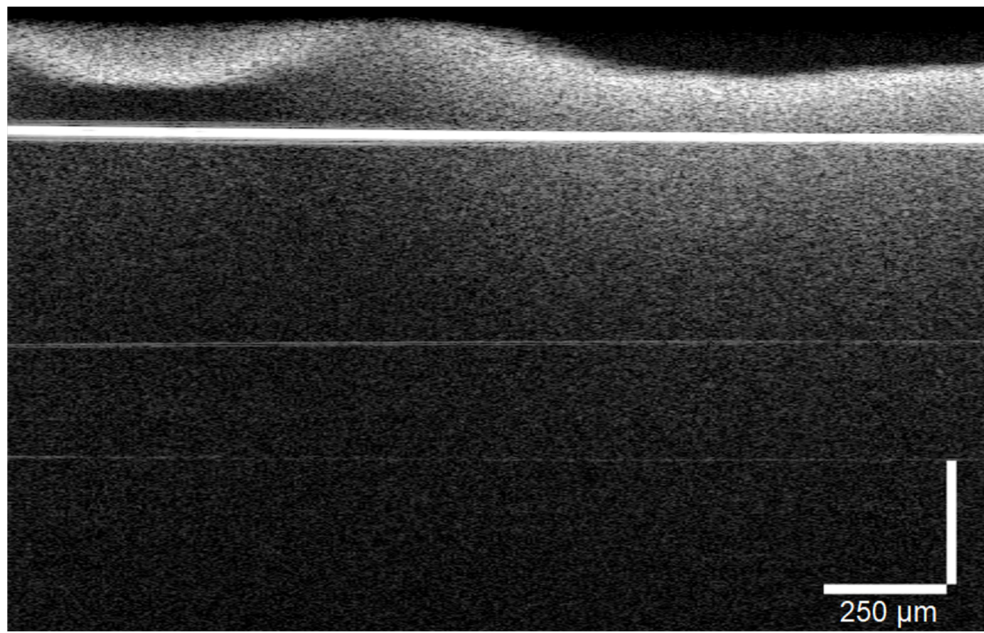

Light+US

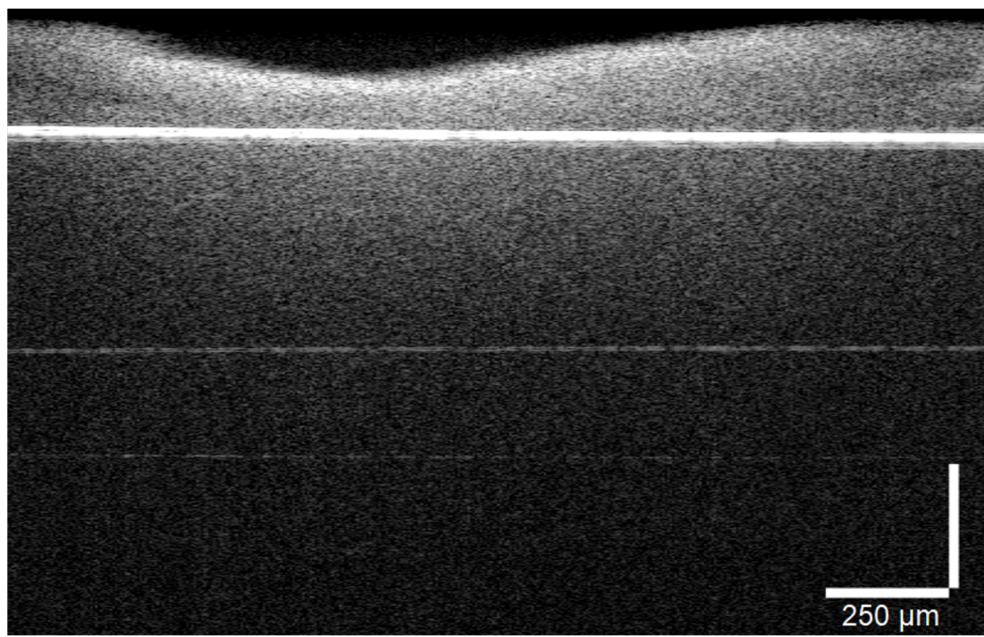

PDI

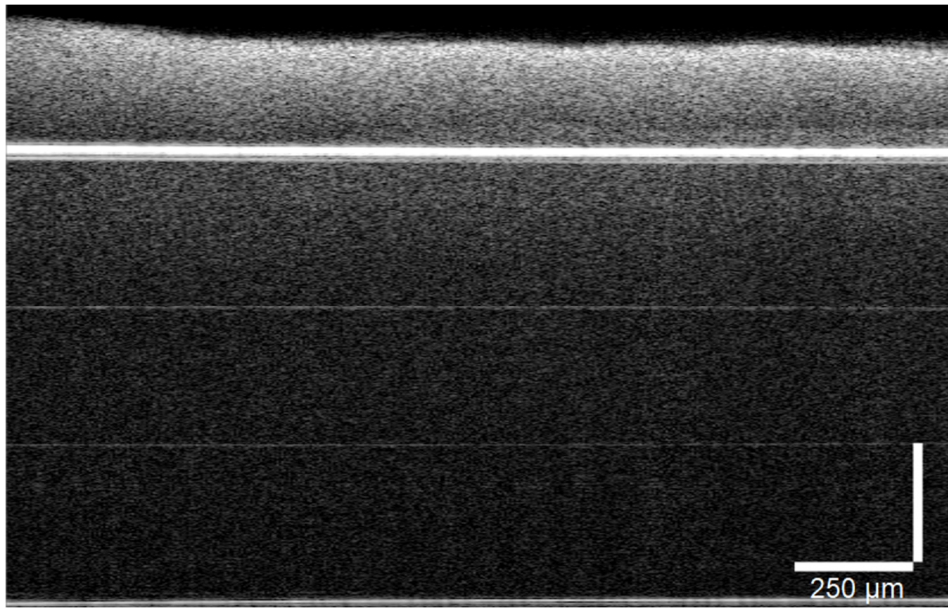

SDI

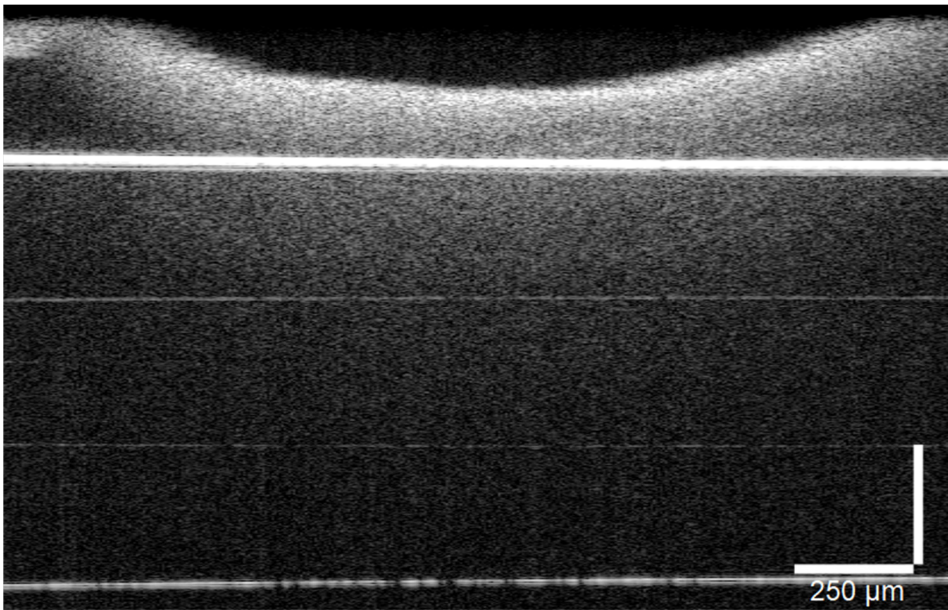

SPDI

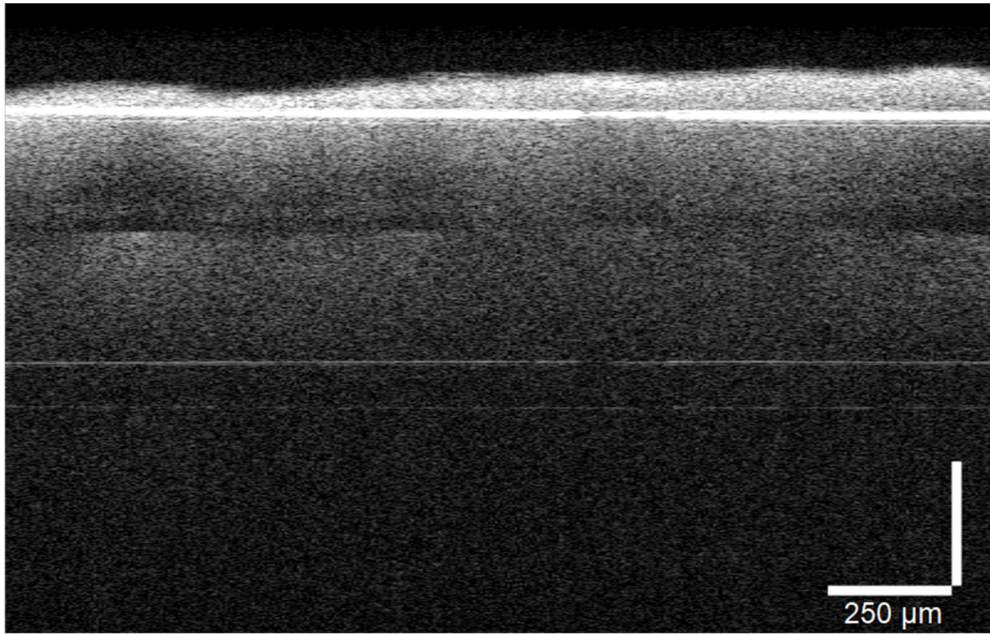

Supplement: s1 [file s1]
